# Supplementary material for: Street Tree Planning to Improve Public Health and Ecosystem Resilience in Urban Areas: A Scenario Analysis Using a System Dynamics Model
Source: MDPI journal article supplement (doi:10.3390/ijerph19031625), 2022-01-31
Supplement: s1 [file s1]

# Supplementary Material

## 1. Model Structure

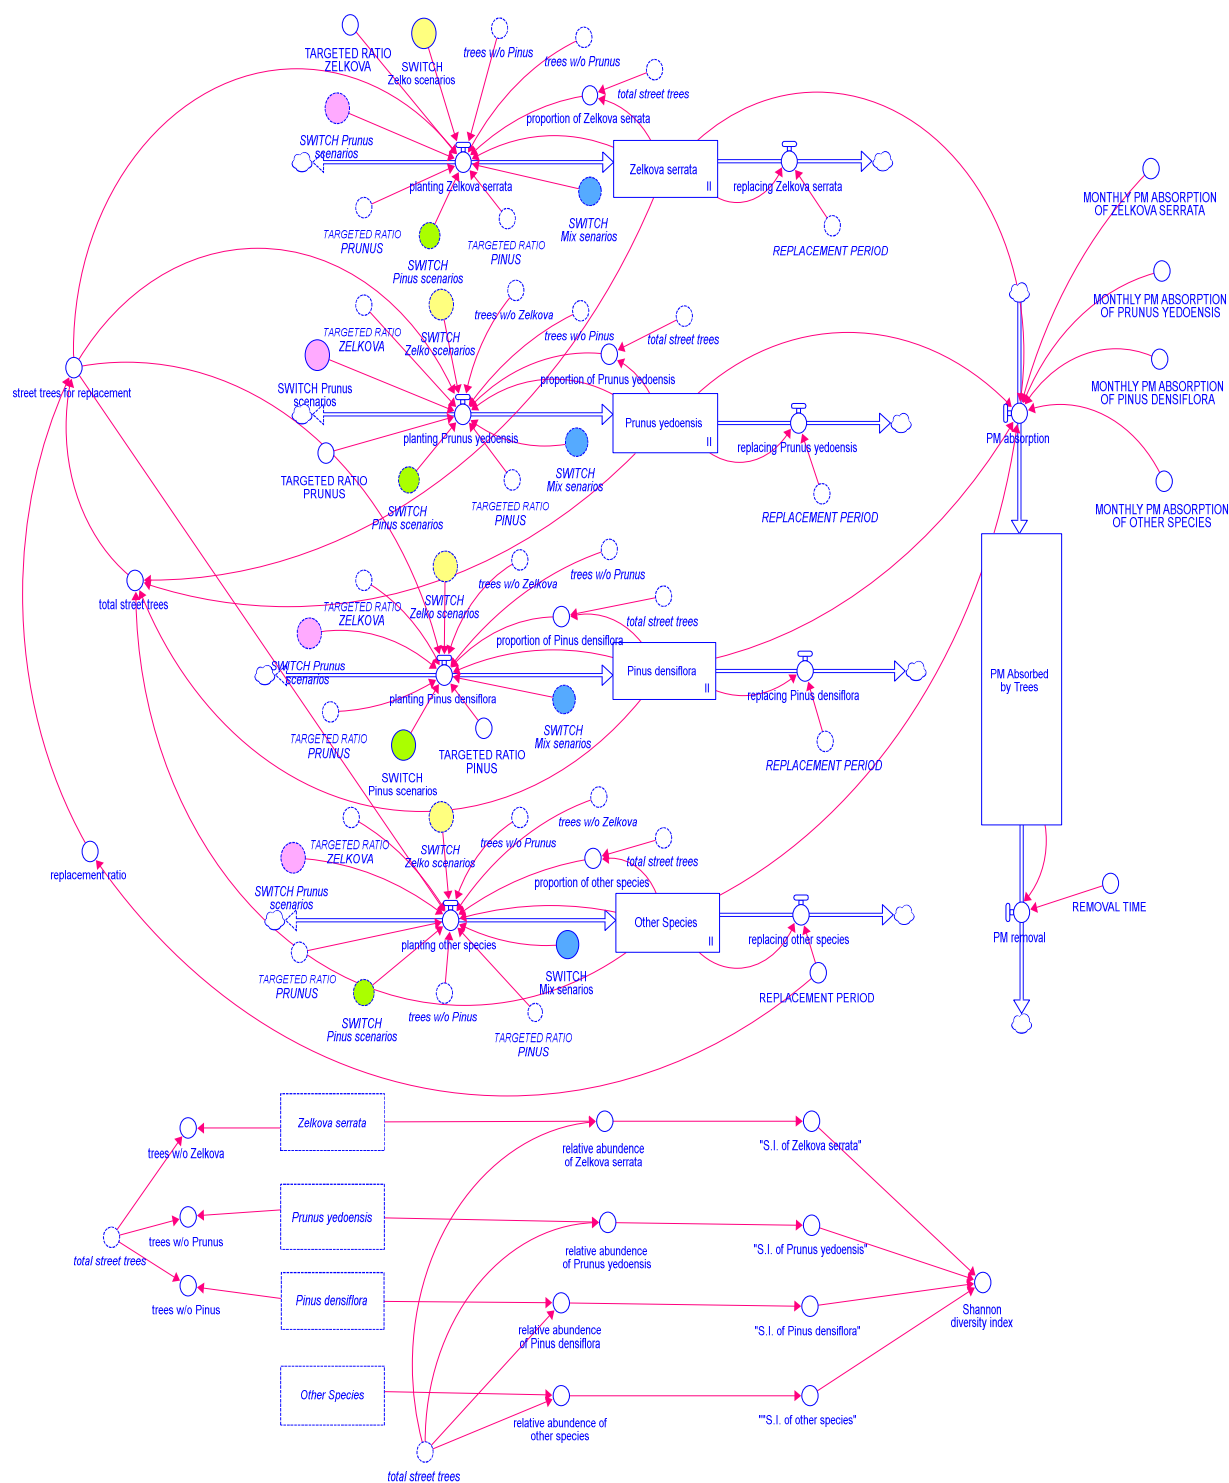

**Figure S1.** Entire model structure

## 2. Model Equations

**Table S1.** Model Equations

| Variable type                                                                       | Variable name             | Equation                                                                                                                                                                                                                                                                                                                                                                                                                                                                                                                                                                                                                                                                                                      | Units        |
|-------------------------------------------------------------------------------------|---------------------------|---------------------------------------------------------------------------------------------------------------------------------------------------------------------------------------------------------------------------------------------------------------------------------------------------------------------------------------------------------------------------------------------------------------------------------------------------------------------------------------------------------------------------------------------------------------------------------------------------------------------------------------------------------------------------------------------------------------|--------------|
|    | Zelkova_serrata(t)        | $Zelkova\_serrata(t - dt) + (planting\_Zelkova\_serrata - replacing\_Zelkova\_serrata) * dt$                                                                                                                                                                                                                                                                                                                                                                                                                                                                                                                                                                                                                  | tree         |
|    | Prunus_yedoensis(t)       | $Prunus\_yedoensis(t - dt) + (planting\_Prunus\_yedoensis - replacing\_Prunus\_yedoensis) * dt$                                                                                                                                                                                                                                                                                                                                                                                                                                                                                                                                                                                                               | tree         |
|    | Pinus_densiflora(t)       | $Pinus\_densiflora(t - dt) + (planting\_Pinus\_densiflora - replacing\_Pinus\_densiflora) * dt$                                                                                                                                                                                                                                                                                                                                                                                                                                                                                                                                                                                                               | tree         |
|    | Other_Species(t)          | $Other\_Species(t - dt) + (planting\_other\_species - replacing\_other\_species) * dt$                                                                                                                                                                                                                                                                                                                                                                                                                                                                                                                                                                                                                        | tree         |
|    | PM_Absorbed_by_Trees(t)   | $PM\_Absorbed\_by\_Trees(t - dt) + (PM\_absorption - PM\_removal) * dt$                                                                                                                                                                                                                                                                                                                                                                                                                                                                                                                                                                                                                                       | g            |
|    | planting_Zelkova_serrata  | $SWITCH\_Zelko\_scenarios * TARGETED\_RATIO\_ZELKOVA * street\_trees\_for\_replacement$<br><br>$+ SWITCH\_Prunus\_scenarios * (1 - TARGETED\_RATIO\_PRUNUS) * street\_trees\_for\_replacement * (Zelkova\_serrata / "trees\_w/o\_Prunus")$<br><br>$+ SWITCH\_Pinus\_scenarios * (1 - TARGETED\_RATIO\_PINUS) * street\_trees\_for\_replacement * (Zelkova\_serrata / "trees\_w/o\_Pinus")$<br><br>$+ SWITCH\_Mix\_scenarios * TARGETED\_RATIO\_ZELKOVA * street\_trees\_for\_replacement$<br><br>$+ (1 - SWITCH\_Zelko\_scenarios) * (1 - SWITCH\_Prunus\_scenarios) * (1 - SWITCH\_Pinus\_scenarios) * (1 - SWITCH\_Mix\_scenarios) * street\_trees\_for\_replacement * proportion\_of\_Zelkova\_serrata$    | Tree /Months |
|  | planting_Prunus_yedoensis | $SWITCH\_Zelko\_scenarios * (1 - TARGETED\_RATIO\_ZELKOVA) * street\_trees\_for\_replacement * (Prunus\_yedoensis / "trees\_w/o\_Zelkova")$<br><br>$+ SWITCH\_Prunus\_scenarios * TARGETED\_RATIO\_PRUNUS * street\_trees\_for\_replacement$<br><br>$+ SWITCH\_Pinus\_scenarios * (1 - TARGETED\_RATIO\_PINUS) * street\_trees\_for\_replacement * (Prunus\_yedoensis / "trees\_w/o\_Pinus")$<br><br>$+ SWITCH\_Mix\_scenarios * TARGETED\_RATIO\_PRUNUS * street\_trees\_for\_replacement$<br><br>$+ (1 - SWITCH\_Zelko\_scenarios) * (1 - SWITCH\_Prunus\_scenarios) * (1 - SWITCH\_Pinus\_scenarios) * (1 - SWITCH\_Mix\_scenarios) * street\_trees\_for\_replacement * proportion\_of\_Prunus\_yedoensis$ | Tree /Months |
|  | planting_Pinus_densiflora | $SWITCH\_Zelko\_scenarios * (1 - TARGETED\_RATIO\_ZELKOVA) * street\_trees\_for\_replacement * (Pinus\_densiflora / "trees\_w/o\_Zelkova")$<br><br>$+ SWITCH\_Prunus\_scenarios * (1 - TARGETED\_RATIO\_PRUNUS) * street\_trees\_for\_replacement * (Pinus\_densiflora / "trees\_w/o\_Prunus")$<br><br>$+ SWITCH\_Pinus\_scenarios * TARGETED\_RATIO\_PINUS * street\_trees\_for\_replacement$                                                                                                                                                                                                                                                                                                                | Tree /Months |

|                                                                                     |                                        |                                                                                                                                                                                                                                                                                                                                                                                                                                                                                                                                                                                                                                                                                 |              |
|-------------------------------------------------------------------------------------|----------------------------------------|---------------------------------------------------------------------------------------------------------------------------------------------------------------------------------------------------------------------------------------------------------------------------------------------------------------------------------------------------------------------------------------------------------------------------------------------------------------------------------------------------------------------------------------------------------------------------------------------------------------------------------------------------------------------------------|--------------|
|                                                                                     |                                        | +SWITCH_Mix_scenarios*TARGETED_RATIO_PINUS<br>*street_trees_for_replacement<br><br>+(1-SWITCH_Zelko_scenarios)*(1-SWITCH_Prunus_scenarios)*(1-SWITCH_Pinus_scenarios)*(1-SWITCH_Mix_scenarios)*street_trees_for_replacement*proportion_of_Pinus_densiflora                                                                                                                                                                                                                                                                                                                                                                                                                      |              |
|    | planting_other_species                 | SWITCH_Zelko_scenarios*(1-TARGETED_RATIO_ZELKOVA)*street_trees_for_replacement*(Other_Species/"trees_w/o_Zelkova")<br><br>+SWITCH_Prunus_scenarios*(1-TARGETED_RATIO_PRUNUS)*street_trees_for_replacement*(Other_Species/"trees_w/o_Prunus")<br><br>+SWITCH_Pinus_scenarios*(1-TARGETED_RATIO_PINUS)*street_trees_for_replacement*(Other_Species/"trees_w/o_Pinus")<br><br>+SWITCH_Mix_scenarios*(1-TARGETED_RATIO_ZELKOVA-TARGETED_RATIO_PRUNUS-TARGETED_RATIO_PINUS)*street_trees_for_replacement<br><br>+(1-SWITCH_Zelko_scenarios)*(1-SWITCH_Prunus_scenarios)*(1-SWITCH_Pinus_scenarios)*(1-SWITCH_Mix_scenarios)*street_trees_for_replacement*proportion_of_other_species | Tree /Months |
|    | replacing_Zelkova_serrata              | Zelkova_serrata/REPLACEMENT_PERIOD                                                                                                                                                                                                                                                                                                                                                                                                                                                                                                                                                                                                                                              | Tree /Months |
|  | replacing_Prunus_yedoensis             | Prunus_yedoensis/REPLACEMENT_PERIOD                                                                                                                                                                                                                                                                                                                                                                                                                                                                                                                                                                                                                                             | Tree /Months |
|  | replacing_Pinus_densiflora             | Pinus_densiflora/REPLACEMENT_PERIOD                                                                                                                                                                                                                                                                                                                                                                                                                                                                                                                                                                                                                                             | Tree /Months |
|  | replacing_other_species                | Other_Species/REPLACEMENT_PERIOD                                                                                                                                                                                                                                                                                                                                                                                                                                                                                                                                                                                                                                                | Tree /Months |
|  | PM_absorption                          | (Zelkova_serrata*MONTHLY_PM_ABSORPTION_OF_ZELKOVA_SERRATA)<br>+(Prunus_yedoensis*MONTHLY_PM_ABSORPTION_OF_PRUNUS_YEDOENSIS)<br>+(Pinus_densiflora*MONTHLY_PM_ABSORPTION_OF_PINUS_DENSIFLORA)<br>+(Other_Species*MONTHLY_PM_ABSORPTION_OF_OTHER_SPECIES)                                                                                                                                                                                                                                                                                                                                                                                                                         | g/Months     |
|  | PM_removal                             | PM_Absorbed_by_Trees/REMOVAL_TIME                                                                                                                                                                                                                                                                                                                                                                                                                                                                                                                                                                                                                                               | g/Months     |
|  | total_street_trees                     | Zelkova_serrata + Prunus_yedoensis + Pinus_densiflora + Other_Species                                                                                                                                                                                                                                                                                                                                                                                                                                                                                                                                                                                                           | tree         |
|  | "trees_w/o_Zelkova"                    | total_street_trees-Zelkova_serrata                                                                                                                                                                                                                                                                                                                                                                                                                                                                                                                                                                                                                                              | tree         |
|  | "trees_w/o_Prunus"                     | total_street_trees-Prunus_yedoensis                                                                                                                                                                                                                                                                                                                                                                                                                                                                                                                                                                                                                                             | tree         |
|  | "trees_w/o_Pinus"                      | total_street_trees-Pinus_densiflora                                                                                                                                                                                                                                                                                                                                                                                                                                                                                                                                                                                                                                             | tree         |
|  | proportion_of_Zelkova_serrata          | Zelkova_serrata/total_street_trees                                                                                                                                                                                                                                                                                                                                                                                                                                                                                                                                                                                                                                              | 1            |
|  | proportion_of_Prunus_yedoensis         | Prunus_yedoensis/total_street_trees                                                                                                                                                                                                                                                                                                                                                                                                                                                                                                                                                                                                                                             | 1            |
|  | proportion_of_Pinus_densiflora         | Pinus_densiflora/total_street_trees                                                                                                                                                                                                                                                                                                                                                                                                                                                                                                                                                                                                                                             | 1            |
|  | proportion_of_other_species            | Other_Species/total_street_trees                                                                                                                                                                                                                                                                                                                                                                                                                                                                                                                                                                                                                                                | 1            |
|  | relative_abundance_of_Zelkova_serrata  | Zelkova_serrata/total_street_trees                                                                                                                                                                                                                                                                                                                                                                                                                                                                                                                                                                                                                                              | 1            |
|  | relative_abundance_of_Prunus_yedoensis | Prunus_yedoensis/total_street_trees                                                                                                                                                                                                                                                                                                                                                                                                                                                                                                                                                                                                                                             | 1            |

|   |                                        |                                                                                                                                                   |              |
|---|----------------------------------------|---------------------------------------------------------------------------------------------------------------------------------------------------|--------------|
| ○ | relative_abundance_of_Pinus_densiflora | Pinus_densiflora/total_street_trees                                                                                                               | 1            |
| ○ | relative_abundance_of_other_species    | Other_Species/total_street_trees                                                                                                                  | 1            |
| ○ | "S.I._of_Zelkova_serrata"              | -<br>relative_abundance_of_Zelkova_serrata*LN(relative_abundance_of_Zelkova_serrata)                                                              | 1            |
| ○ | "S.I._of_Prunus_yedoensis"             | -<br>relative_abundance_of_Prunus_yedoensis*LN(relative_abundance_of_Prunus_yedoensis)                                                            | 1            |
| ○ | "S.I._of_Pinus_densiflora"             | IF(relative_abundance_of_Pinus_densiflora=0) THEN 0 ELSE (-<br>relative_abundance_of_Pinus_densiflora*LN(relative_abundance_of_Pinus_densiflora)) | 1            |
| ○ | "S.I._of_other_species"                | IF(relative_abundance_of_other_species=0) THEN 0 ELSE (-<br>relative_abundance_of_other_species*LN(relative_abundance_of_other_species))          | 1            |
| ○ | Shannon_diversity_index                | "S.I._of_Zelkova_serrata"+"S.I._of_Prunus_yedoensis"+"S.I._of_Pinus_densiflora"+"S.I._of_other_species"                                           | 1            |
| ○ | replacement_ratio                      | 1/REPLACEMENT_PERIOD                                                                                                                              | 1/Month      |
| ○ | street_trees_for_replacement           | replacement_ratio*total_street_trees                                                                                                              | Tree /Months |
| ○ | REMOVAL_TIME                           | 1                                                                                                                                                 | Months       |
| ○ | REPLACEMENT_PERIOD                     | 20*12                                                                                                                                             | Months       |

### 3. Input Values of Parameters

#### 3.1 PM Absorption of Trees

**Table S2.** Model equations for PM absorption of trees

| Parameter name                            | Input values | Units        |
|-------------------------------------------|--------------|--------------|
| MONTHLY_PM_ABSORPTION_OF_ZELKOVA_SERRATA  | 66.6/12      | g/tree/month |
| MONTHLY_PM_ABSORPTION_OF_PRUNUS_YEDOENSIS | 45.3/12      | g/tree/month |
| MONTHLY_PM_ABSORPTION_OF_PINUS_DENSIFLORA | 24.2/12      | g/tree/Month |
| MONTHLY_PM_ABSORPTION_OF_OTHER_SPECIES    | 35.7/12      | g/tree/month |

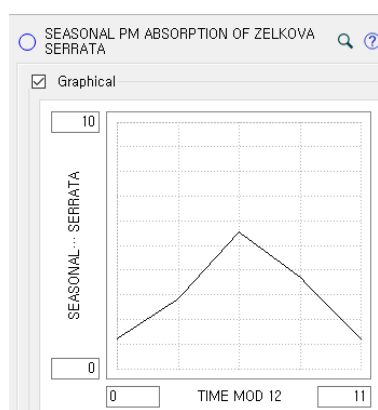

(a)

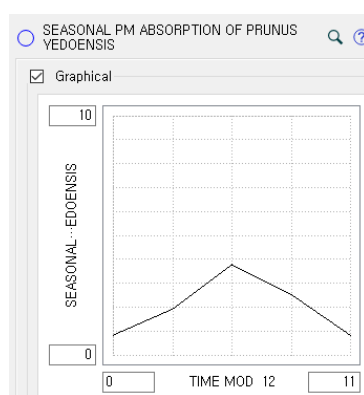

(b)

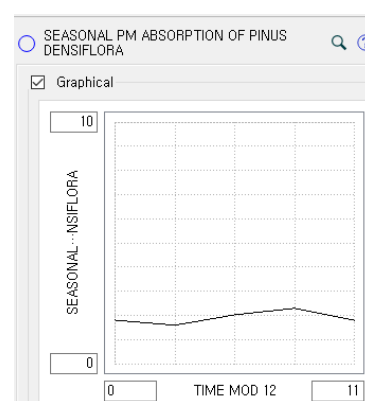

(c)

**Figure S2.** Model equations for seasonal PM absorption of trees: (a) *Zelkova serrata*; (b) *Prunus yedoensis*; (c) *Pinus densiflora*.

### 3.2 Scenario analysis

**Table S3.** Model equations for scenario analysis

| Scenario       | Parameter name                          | Input values | Units |
|----------------|-----------------------------------------|--------------|-------|
| Baseline       | SWITCH_Zelko_scenarios                  | 0            | 1     |
|                | SWITCH_Prunus_scenarios                 | 0            | 1     |
|                | SWITCH_Pinus_scenarios                  | 0            | 1     |
|                | SWITCH_Mix_scenarios                    | 0            | 1     |
|                | TARGETED_RATIO_ZELKOVA                  | 0            | 1     |
|                | TARGETED_RATIO_PRUNUS                   | 0            | 1     |
|                | TARGETED_RATIO_PINUS                    | 0            | 1     |
|                | Initial value of Zelkova serrata        | 112          | tree  |
|                | Initial value of Prunus yedoensis       | 70           | tree  |
|                | Initial value of Pinus densiflora       | 0            | tree  |
|                | Initial value of Other species          | 26           | tree  |
|                | Initial value of PM absorption by trees | 963          | g     |
| Rep_only_Zelko | SWITCH_Zelko_scenarios                  | 1            | 1     |
|                | SWITCH_Prunus_scenarios                 | 0            | 1     |
|                | SWITCH_Pinus_scenarios                  | 0            | 1     |
|                | SWITCH_Mix_scenarios                    | 0            | 1     |
|                | TARGETED_RATIO_ZELKOVA                  | 0.7          | 1     |
|                | TARGETED_RATIO_PRUNUS                   | 0            | 1     |
|                | TARGETED_RATIO_PINUS                    | 0            | 1     |
|                | Initial value of Zelkova serrata        | 112          | tree  |
|                | Initial value of Prunus yedoensis       | 70           | tree  |
|                | Initial value of Pinus densiflora       | 0            | tree  |
|                | Initial value of Other species          | 26           | tree  |
|                | Initial value of PM absorption by trees | 963          | g     |
| Rep_only_Prun  | SWITCH_Zelko_scenarios                  | 0            | 1     |
|                | SWITCH_Prunus_scenarios                 | 1            | 1     |
|                | SWITCH_Pinus_scenarios                  | 0            | 1     |
|                | SWITCH_Mix_scenarios                    | 0            | 1     |
|                | TARGETED_RATIO_ZELKOVA                  | 0            | 1     |
|                | TARGETED_RATIO_PRUNUS                   | 0.7          | 1     |
|                | TARGETED_RATIO_PINUS                    | 0            | 1     |
|                | Initial value of Zelkova serrata        | 112          | tree  |
|                | Initial value of Prunus yedoensis       | 70           | tree  |
|                | Initial value of Pinus densiflora       | 0            | tree  |
|                | Initial value of Other species          | 26           | tree  |
|                | Initial value of PM absorption by trees | 963          | g     |
| Rep_only_Pinus | SWITCH_Zelko_scenarios                  | 0            | 1     |
|                | SWITCH_Prunus_scenarios                 | 0            | 1     |
|                | SWITCH_Pinus_scenarios                  | 1            | 1     |
|                | SWITCH_Mix_scenarios                    | 0            | 1     |
|                | TARGETED_RATIO_ZELKOVA                  | 0            | 1     |
|                | TARGETED_RATIO_PRUNUS                   | 0            | 1     |
|                | TARGETED_RATIO_PINUS                    | 0.7          | 1     |
|                | Initial value of Zelkova serrata        | 112          | tree  |
|                | Initial value of Prunus yedoensis       | 70           | tree  |
|                | Initial value of Pinus densiflora       | 0            | tree  |
|                | Initial value of Other species          | 26           | tree  |

|                  |                                         |      |      |
|------------------|-----------------------------------------|------|------|
|                  | Initial value of PM absorption by trees | 963  | g    |
| Rep_only_Mix     | SWITCH_Zelko_scenarios                  | 0    | 1    |
|                  | SWITCH_Prunus_scenarios                 | 0    | 1    |
|                  | SWITCH_Pinus_scenarios                  | 0    | 1    |
|                  | SWITCH_Mix_scenarios                    | 1    | 1    |
|                  | TARGETED_RATIO_ZELKOVA                  | 0.3  | 1    |
|                  | TARGETED_RATIO_PRUNUS                   | 0.3  | 1    |
|                  | TARGETED_RATIO_PINUS                    | 0.3  | 1    |
|                  | Initial value of Zelkova serrata        | 112  | tree |
|                  | Initial value of Prunus yedoensis       | 70   | tree |
|                  | Initial value of Pinus densiflora       | 0    | tree |
|                  | Initial value of Other species          | 26   | tree |
|                  | Initial value of PM absorption by trees | 963  | g    |
| Plant_more_Zelko | SWITCH_Zelko_scenarios                  | 1    | 1    |
|                  | SWITCH_Prunus_scenarios                 | 0    | 1    |
|                  | SWITCH_Pinus_scenarios                  | 0    | 1    |
|                  | SWITCH_Mix_scenarios                    | 0    | 1    |
|                  | TARGETED_RATIO_ZELKOVA                  | 0.7  | 1    |
|                  | TARGETED_RATIO_PRUNUS                   | 0    | 1    |
|                  | TARGETED_RATIO_PINUS                    | 0    | 1    |
|                  | Initial value of Zelkova serrata        | 292  | tree |
|                  | Initial value of Prunus yedoensis       | 70   | tree |
|                  | Initial value of Pinus densiflora       | 0    | tree |
|                  | Initial value of Other species          | 26   | tree |
|                  | Initial value of PM absorption by trees | 1962 | g    |
| Plant_more_Prun  | SWITCH_Zelko_scenarios                  | 0    | 1    |
|                  | SWITCH_Prunus_scenarios                 | 1    | 1    |
|                  | SWITCH_Pinus_scenarios                  | 0    | 1    |
|                  | SWITCH_Mix_scenarios                    | 0    | 1    |
|                  | TARGETED_RATIO_ZELKOVA                  | 0    | 1    |
|                  | TARGETED_RATIO_PRUNUS                   | 0.7  | 1    |
|                  | TARGETED_RATIO_PINUS                    | 0    | 1    |
|                  | Initial value of Zelkova serrata        | 112  | tree |
|                  | Initial value of Prunus yedoensis       | 250  | tree |
|                  | Initial value of Pinus densiflora       | 0    | tree |
|                  | Initial value of Other species          | 26   | tree |
|                  | Initial value of PM absorption by trees | 1643 | g    |
| Plant_more_Pinus | SWITCH_Zelko_scenarios                  | 0    | 1    |
|                  | SWITCH_Prunus_scenarios                 | 0    | 1    |
|                  | SWITCH_Pinus_scenarios                  | 1    | 1    |
|                  | SWITCH_Mix_scenarios                    | 0    | 1    |
|                  | TARGETED_RATIO_ZELKOVA                  | 0    | 1    |
|                  | TARGETED_RATIO_PRUNUS                   | 0    | 1    |
|                  | TARGETED_RATIO_PINUS                    | 0.7  | 1    |
|                  | Initial value of Zelkova serrata        | 112  | tree |
|                  | Initial value of Prunus yedoensis       | 70   | tree |
|                  | Initial value of Pinus densiflora       | 180  | tree |
|                  | Initial value of Other species          | 26   | tree |
|                  | Initial value of PM absorption by trees | 1326 | g    |
| Plant_more_Mix   | SWITCH_Zelko_scenarios                  | 0    | 1    |
|                  | SWITCH_Prunus_scenarios                 | 0    | 1    |
|                  | SWITCH_Pinus_scenarios                  | 0    | 1    |

|                                         |      |      |
|-----------------------------------------|------|------|
| SWITCH_Mix_senarios                     | 1    | 1    |
| TARGETED_RATIO_ZELKOVA                  | 0.3  | 1    |
| TARGETED_RATIO_PRUNUS                   | 0.3  | 1    |
| TARGETED_RATIO_PINUS                    | 0.3  | 1    |
| Initial value of Zelkova serrata        | 172  | tree |
| Initial value of Prunus yedoensis       | 130  | tree |
| Initial value of Pinus densiflora       | 60   | tree |
| Initial value of Other species          | 26   | tree |
| Initial value of PM absorption by trees | 1644 | g    |

---
